# Supplementary material
Source: PubMed Central journal article supplement (PMC3028668)
Supplement: supp_193_4_822__1.pdf [file supp_193_4_822__1.pdf]

TABLE S1. Primers used in this study

| Primer name                                     | Sequence (5'-3')                                 | Description                                                                                                            |
|-------------------------------------------------|--------------------------------------------------|------------------------------------------------------------------------------------------------------------------------|
| <i>For construction of mutants</i>              |                                                  |                                                                                                                        |
| srtG-A                                          | GGAGAATTGCCATCAAC<br>AGG                         | Amplification of upstream region of <i>srtG</i> and fused fragment of upstream and downstream regions of <i>srtG</i>   |
| srtG-B                                          | TCTCTTCTGATCACGATC<br>AGGTACAGGCTG               | Amplification of upstream region of <i>srtG</i>                                                                        |
| srtG-C                                          | CAGCCTGTACCTGATCGT<br>GATCAGAAGAGA               | Amplification of downstream region of <i>srtG</i>                                                                      |
| srtG-D                                          | CCTTATAAGGCAGGTAG<br>AGT                         | Amplification of downstream region of <i>srtG</i> and fused fragment of upstream and downstream regions of <i>srtG</i> |
| sgp1-A                                          | GCAAGCGGTGAGACAGA<br>TAG                         | Amplification of upstream region of <i>sgp1</i> and fused fragment of upstream and downstream regions of <i>sgp1</i>   |
| sgp1-B                                          | TAGGTATGTTCCCATACG<br>TGCATTCATTCC               | Amplification of upstream region of <i>sgp1</i>                                                                        |
| sgp1-C                                          | GGAATGAATGCACGTAT<br>GGGAACATACCTA               | Amplification of downstream region of <i>sgp1</i>                                                                      |
| sgp1-D                                          | CTAGAATCCCCTCACGT<br>AAG                         | Amplification of downstream region of <i>sgp1</i> and fused fragment of upstream and downstream regions of <i>sgp1</i> |
| sgp2-A                                          | TACCGAAACGAATCGGT<br>CAG                         | Amplification of upstream region of <i>sgp2</i> and fused fragment of upstream and downstream regions of <i>sgp2</i>   |
| sgp2-B                                          | ACCATACCCACCTGTAA<br>CCAAGGAGCCATC               | Amplification of upstream region of <i>sgp2</i>                                                                        |
| sgp2-C                                          | GATGGCTCCTTGGTTACA<br>GGTGGGTATGGT               | Amplification of downstream region of <i>sgp2</i>                                                                      |
| sgp2-D                                          | ACTTTTGATGCTTTGGCT<br>TG                         | Amplification of downstream region of <i>sgp2</i> and fused fragment of upstream and downstream regions of <i>sgp2</i> |
| cps2B-F                                         | AGTGTTGACTGCGGGGT<br>TGGC                        | Amplification of a internal region of <i>cps2B</i>                                                                     |
| cps2B-R                                         | CGTTGCTACTTGTGTCAA<br>TACATC                     | Amplification of a internal region of <i>cps2B</i>                                                                     |
| <i>For construction of complemented mutants</i> |                                                  |                                                                                                                        |
| srtG-CF                                         | AGAAGGATCCAACAAGT<br>ATGGAGGGAAGGC <sup>a</sup>  | Complementation of <i>srtG</i>                                                                                         |
| srtG-CR                                         | GCATGAATTCGGTACAA<br>ATGACTCAATAGA <sup>b</sup>  | Complementation of <i>srtG</i>                                                                                         |
| sgp1-CF                                         | ACATGGATCCGAGAAGA<br>GAAAGCAGATTGC <sup>a</sup>  | Complementation of <i>sgp1</i>                                                                                         |
| sgp1-CR                                         | TAGAGAATTC AACGCCT<br>TCCCTCCATACTT <sup>b</sup> | Complementation of <i>sgp1</i>                                                                                         |

TABLE S1. (continued)

| Primer name                                                | Sequence (5'-3')                                | Description                                               |
|------------------------------------------------------------|-------------------------------------------------|-----------------------------------------------------------|
| sgp2-CF                                                    | TGTGCCATGGTACCAAA<br>AGATTCTTTGCTA <sup>c</sup> | Complementation of <i>sgp2</i>                            |
| sgp2-CR                                                    | CTTTCCATGGTTAAGCAA<br>TCTGCTTTCTCT <sup>c</sup> | Complementation of <i>sgp2</i>                            |
| <i>For construction of His-tagged recombinant proteins</i> |                                                 |                                                           |
| rSgp1-F                                                    | TACCCTTTATCATATGGG<br>TGAAGGTGTATA <sup>d</sup> | Generation of His-tagged recombinant Sgp1<br>(50th-453rd) |
| rSgp1-R                                                    | TCAAGGATCCAACCAAC<br>TTGTGTGCTATCC <sup>a</sup> | Generation of His-tagged recombinant Sgp1<br>(50th-453rd) |
| rSgp2-F                                                    | TATGCGTTAGAGCATAT<br>GAGTGAGTCAACA <sup>d</sup> | Generation of His-tagged recombinant Sgp2<br>(34th-457th) |
| rSgp2-R                                                    | AGATGGATCCGATAGAG<br>TTCATGCGTATCT <sup>a</sup> | Generation of His-tagged recombinant Sgp2<br>(34th-457th) |

<sup>a</sup> BamHI restriction site is underlined.

<sup>b</sup> EcoRI restriction site is underlined.

<sup>c</sup> NcoI restriction site is underlined.

<sup>d</sup> NdeI restriction site is underlined.

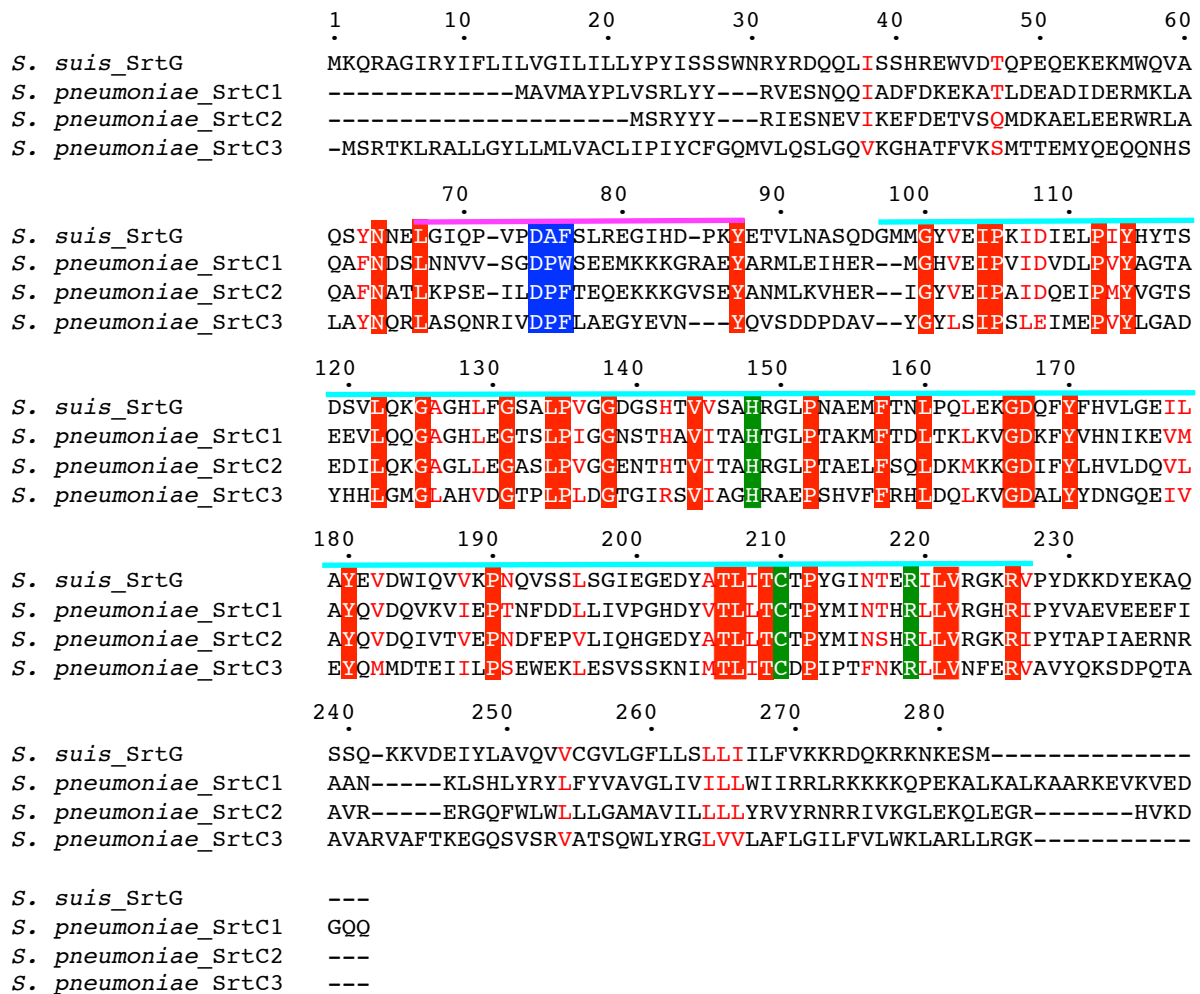

FIG. S1. Amino acid sequence alignment of the SrtG and the three class C sortases in the pneumococcal *rlrA* pilus islet (SrtC1, SrtC2, and SrtC3). Identical residues are shown with a red background, whereas similar residues are shown in red. The class C sortase domain regions are shown in cyan line, and the catalytic active site are highlighted in green. The lid regions of *S. pneumoniae* are shown in magenta line, and the lid anchor residues are highlighted in blue. The GenBank accession numbers of the listed proteins are follows: SrtC1, AAK74626; SrtC2, AAK74627; SrtC3, AAK74628.

Fig.S1
